# Supplementary material for: Deep NIR-I Emissive Iridium(III) Complex Bearing D-A Ligand: Synthesis, Photophysical Properties and DFT/TDDFT Calculation
Source: MDPI journal article supplement (doi:10.3390/cryst11091038), 2021-08-29
Supplement: s1 [file s1]

# Deep NIR-I Emissive Iridium(III) Complex Bearing D-A Ligand: Synthesis, Photophysical Properties and DFT/TDDFT Computation

Jia-Yang Jiang <sup>1,\*</sup>, Zi-Han Xu <sup>1,†</sup>, Tang Li <sup>1,\*</sup>, Da-Hua Cai <sup>1</sup>, Hui Zhou <sup>1</sup> and Ze-Jing Chen <sup>2,\*</sup>

<sup>1</sup> Engineering Technology Training Center, Nanjing Vocational University of Industry Technology, 1 Yangshan North Road, Nanjing 210023, China; 2019301035@niit.edu.cn (Z.-H.X.); 1989100095@niit.edu.cn (D.-H.C.); 1990100107@niit.edu.cn (H.Z.)

<sup>2</sup> Jiangxi Key Laboratory for Nanobiomaterials, Institute of Advanced Materials (IAM), East China Jiaotong University (ECJTU), 808 Shuanggang East Main Street, Nanchang 330013, China

\* Correspondence: 2019101032@niit.edu.cn (J.-Y.J.); 2019101009@niit.edu.cn (T.L.); iamzjchen@ecjtu.edu.cn (Z.-J.C.)

† These two authors contributed equally to this work.

**Table S1.** The frontier orbital energy for complex 4.

| Spin State    | Orbital | Energy (eV) (Calculated) |
|---------------|---------|--------------------------|
| Singlet state | LUMO+5  | −0.8547                  |
|               | LUMO+4  | −1.3739                  |
|               | LUMO+3  | −1.3872                  |
|               | LUMO+2  | −2.1481                  |
|               | LUMO+1  | −2.5426                  |
|               | LUMO    | −2.5845                  |
|               | HOMO    | −5.3057                  |
|               | HOMO-1  | −5.8311                  |
|               | HOMO-2  | −6.0224                  |
|               | HOMO-3  | −6.3375                  |
|               | HOMO-4  | −6.3400                  |
|               | HOMO-5  | −6.6431                  |
| Triple state  | LUMO+1  | −2.5655                  |
|               | LUMO    | −2.6545                  |
|               | HOMO    | −5.1713                  |
|               | HOMO-1  | −5.7337                  |

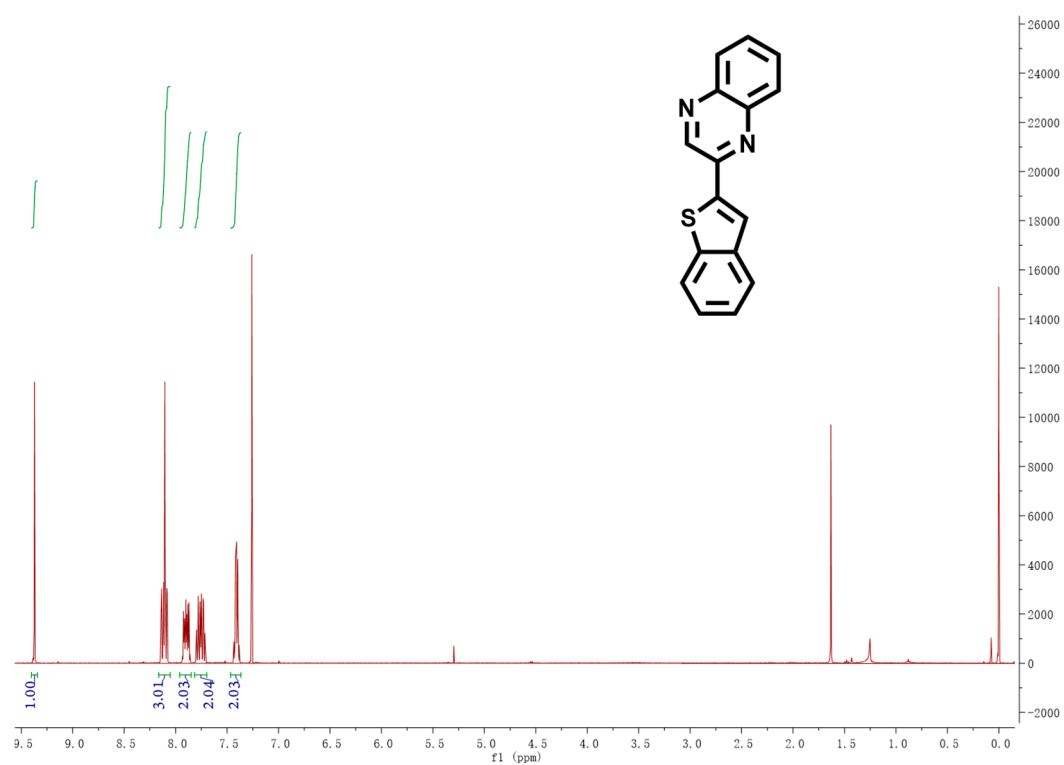

**Figure S1.**  $^1\text{H}$  NMR spectrum of ligand 1.

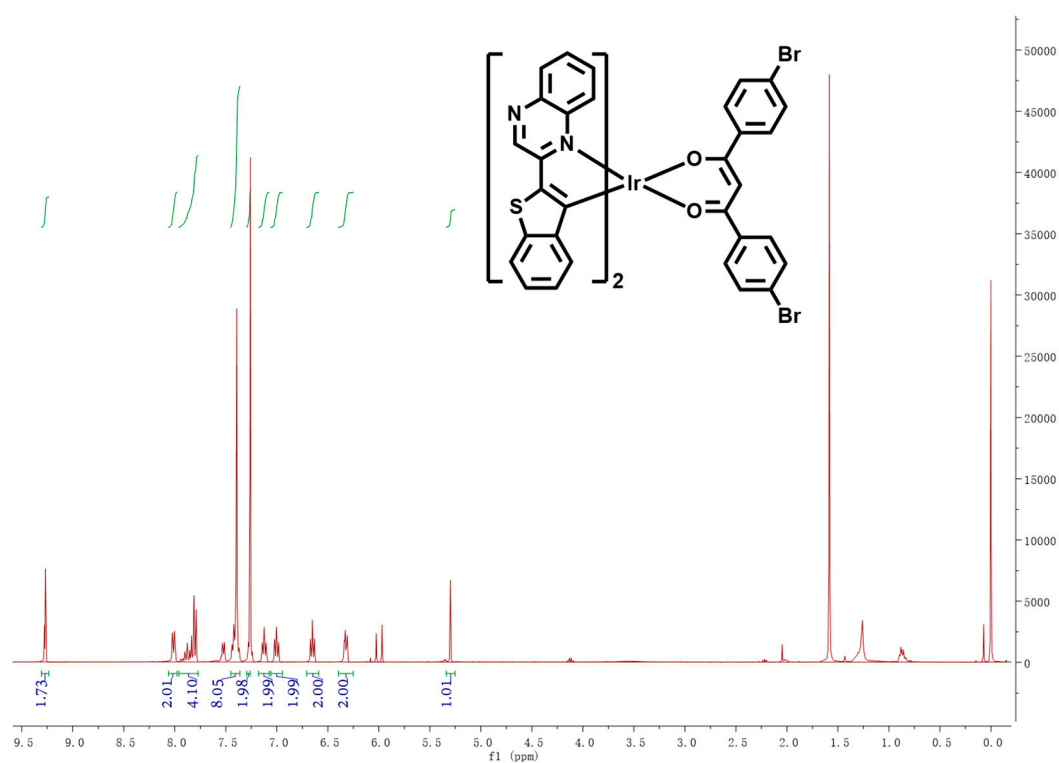

**Figure S2.**  $^1\text{H}$  NMR spectrum of complex 4.

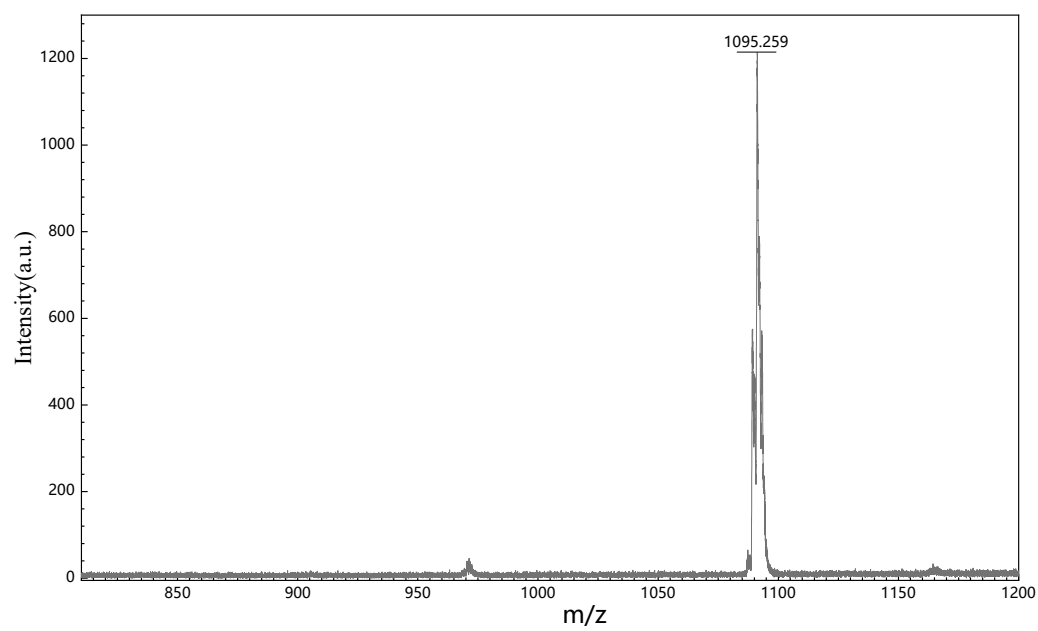

**Figure S3.** MALDI-TOF spectrum of complex 4.

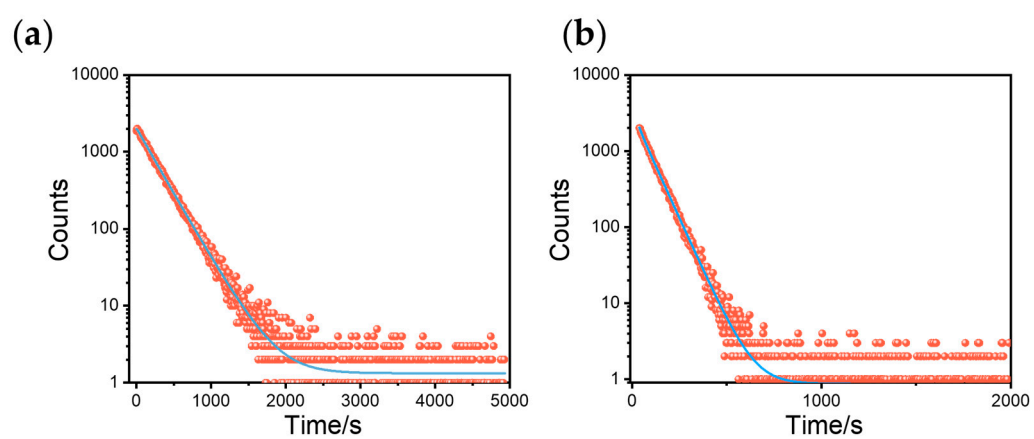

**Figure S4.** Transient photoluminescence decay spectra of complex **4** in (a)  $\text{CH}_2\text{Cl}_2$  and (b)  $\text{CH}_3\text{OH}/\text{H}_2\text{O}$ .

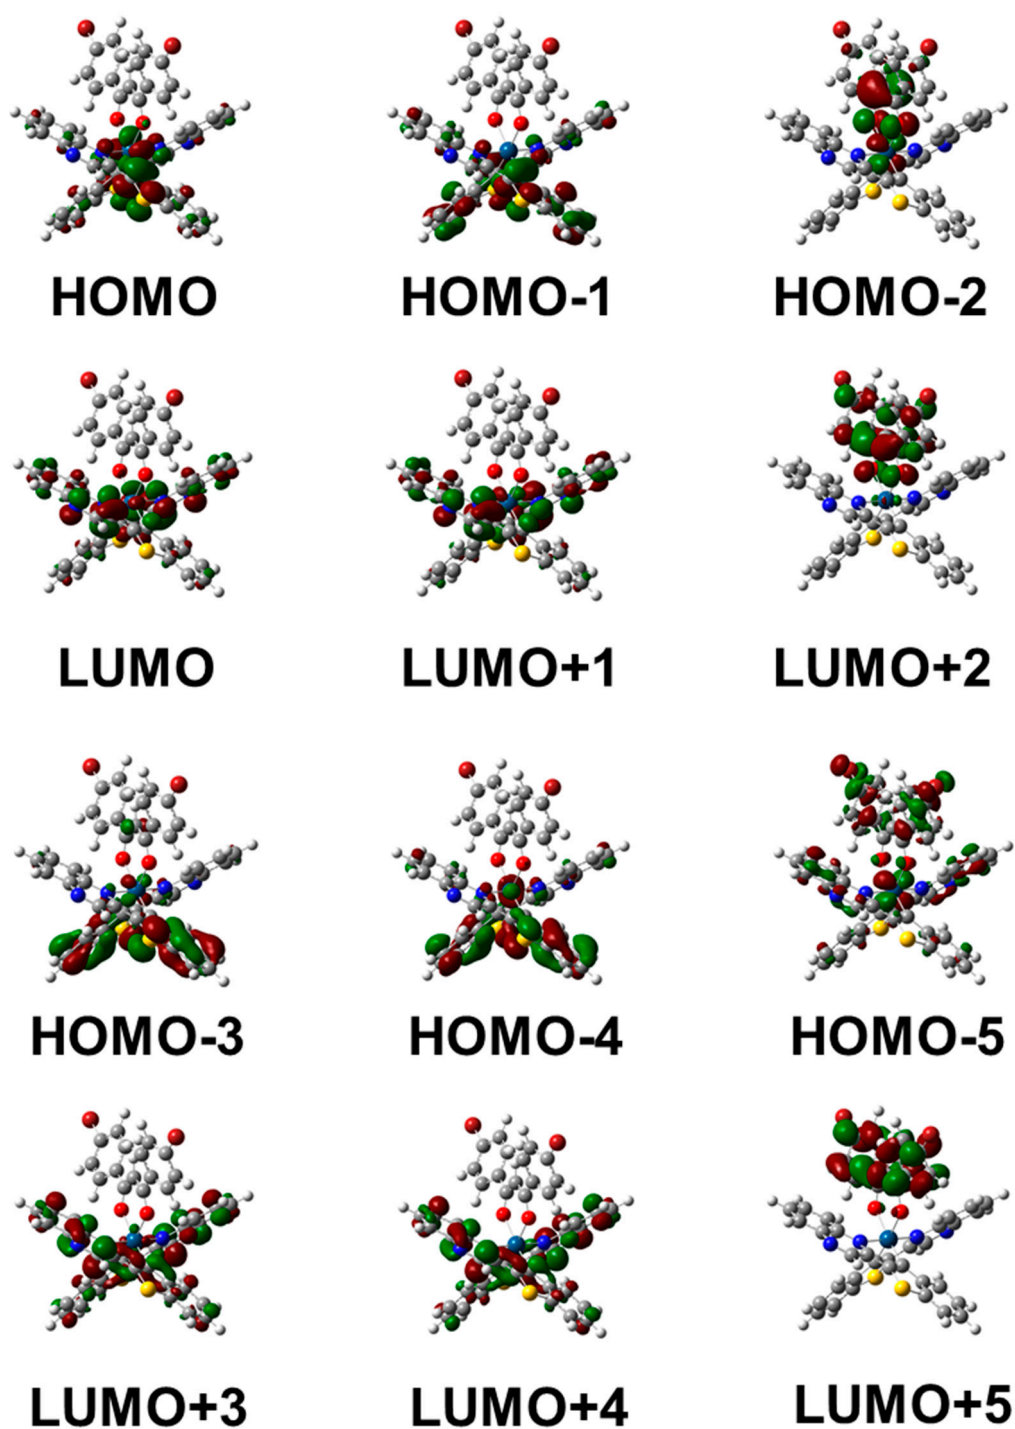

Figure S5. Isodensity plots of ground state frontier orbitals of complex 4.

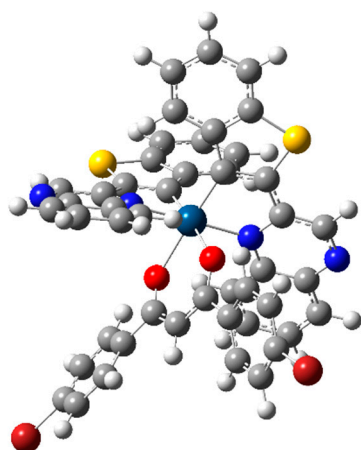

**Figure S6.** The excited state geometry structure of complex 4.

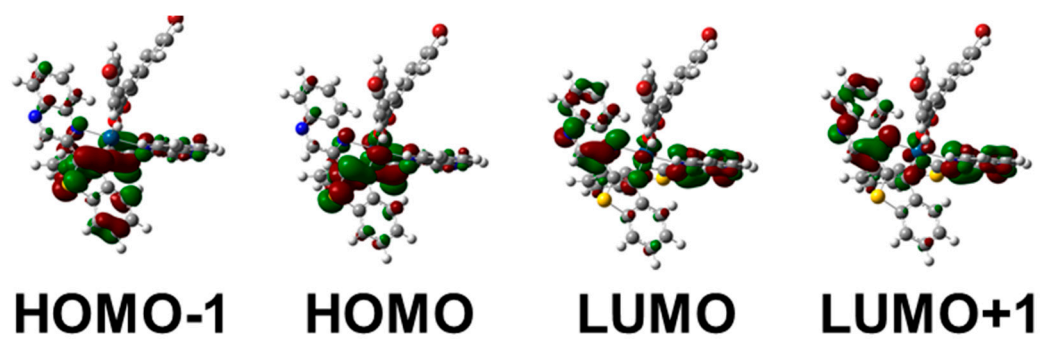

**Figure S7.** Isodensity plots of excited state frontier orbitals of complex 4.
